# Supplementary material
Source: PubMed Central journal article supplement (PMC2651337)
Supplement: 0813267106_0813267106SI.pdf [file 0813267106_0813267106SI.pdf]

# Supporting Information

Napetschnig *et al.* 10.1073/pnas.0813267106

## SI Text

**Protein Expression and Purification.** DNA fragments of the Nup214 NTD and the Nup214 NTD 1–405, encompassing residues 1 to 450 and 1 to 405, respectively, were amplified by PCR from a human Nup214 cDNA construct (KIAA0023) and cloned in a pET28a vector (pET28a-PreS) modified to contain a PreScission protease-cleavable N-terminal hexa-histidine tag (1). For Nup214 NTD  $\Delta$ 6D7A, residues 343 to 361 were replaced by a flexible linker with the sequence GGSGG and cloned in the pET28a-PreS vector, as described above. A DNA fragment encompassing residues 343 to 361 of the Nup214 NTD 6D7A loop and followed by a hexa-histidine tag was cloned into the pGEX-6P1 vector (GE Healthcare). DNA fragments of the full-length human Ddx19, and a Ddx19 fragment, encompassing residues 1 to 300 (Ddx19 NTD), were amplified from HeLa cell cDNA, and cloned in the pET28a-PreS vector. Mutants of the Nup214 NTD and Ddx19 were generated using Quikchange site-directed mutagenesis (Stratagene). The details of the expression constructs and the mutants of Nup214 and Ddx19 are listed in Tables S2–S4.

The different constructs of Nup214 and the GST-6D7A-HIS loop fusion protein were expressed and purified as described for the Nup214 NTD (2). For expression of Ddx19, Ddx19 NTD, and Ddx19 mutants, *E. coli* BL21(DE3) cells (Stratagene) were grown at 37°C to an OD<sub>600</sub> of 0.6 and induced with 450  $\mu$ M isopropyl- $\beta$ -D-thio-galactoside at 17°C for 9 h. Cells were harvested by centrifugation and resuspended in a lysis buffer containing 20 mM Tris, pH 8.0, 500 mM NaCl, 5 mM  $\beta$ -mercaptoethanol, 1 mM PMSF, and Complete EDTA-free protease inhibitor mixture tablets (Roche). The cells were lysed with a cell disrupter (Avestin), and the lysate was clarified by centrifugation at 40,000 g for 90 min. The lysate was then loaded onto a Ni-NTA column (Qiagen) and eluted via an imidazole gradient. Fractions containing hexa-histidine tagged Ddx19 were pooled, and glycerol was added to a final concentration of 10% (vol/vol). The protein was further purified after cleavage of the hexa-histidine tag with PreScission protease (GE Healthcare) by size exclusion chromatography on a 16/60 Superdex 200 column (GE Healthcare) that was equilibrated in a buffer containing 20 mM Tris, pH 8.0, 100 mM KCl, 10% glycerol, and 5 mM DTT.

For complex formation, Nup214 NTD was incubated with an equimolar amount of either Ddx19 or Ddx19 NTD and purified by size exclusion chromatography on a 16/60 Superdex 200 column (GE Healthcare) that was equilibrated in a buffer containing 20 mM Tris pH 8.0, 100 mM KCl, 5% glycerol, 5 mM DTT and 0.5 mM Mg-ADP (Spectrum Chemical). The fractions containing the complex were pooled and concentrated to 40 mg/mL for crystallization.

**Protein Interaction Analysis.** Protein interaction experiments were carried out on a Superdex 200 10/300 GL gel filtration column (GE Healthcare) that was equilibrated in a buffer containing 20 mM Tris, pH 8.0, 100 mM KCl, 10% (vol/vol) glycerol, and 5 mM DTT. Complexes were formed by incubating 1 mg of the various purified proteins, their mutants, or variants for 30 min at 4°C. Complex formation was monitored by injection of the preincubated proteins and the recombinant purified proteins in isolation. All proteins were analyzed under the same buffer conditions, and complex formation was confirmed by SDS/PAGE of the eluted fractions followed by Coomassie brilliant blue staining.

**Peptide Binding Assay.** A peptide array composed of 20-mers with an offset of 3 residues covering the entire sequence of human Ddx19 was synthesized and immobilized onto a nitrocellulose membrane (Rockefeller University Proteomics Resource Center). The peptide array was blocked for 7 h in TBS-Tween buffer supplemented with 5% (wt/vol) milk powder and washed 3 times for 10 min in TBS-Tween buffer followed by a single wash step in transport buffer (20 mM Hepes-KOH, pH 7.5, 110 mM potassium acetate, 2 mM MgCl<sub>2</sub>, 0.1% Tween-20). The peptide array was then incubated with the *in vitro* transcribed, translated, and [<sup>35</sup>S]-methionine-labeled Nup214 NTD (Promega, TnT quick coupled Transcription/Translation system) in transport buffer at 4°C. Before detection by autoradiography, the membrane was washed 4 times for 10 min with transport buffer.

**Generation of a Ddx19 Homology Model.** Based on the structure of the *M. jannaschii* DEAD-box helicase MjDEAD (PDB code 1HV8) (3) and a sequence alignment of 10 eukaryotic Ddx19 homologs (Fig. S1), we generated a homology model for human Ddx19 using MODELLER (4). Although the central core region that contains the 10 conserved sequence motifs aligned without major sequence gaps, the Ddx19-specific N-terminal sequence is not conserved in MjDEAD. Hence, we were able to generate a model for the core region, but we are unable to model the unique N-terminal extension of Ddx19.

**Crystallization and Data Collection.** Crystals of human Nup214 NTD•Ddx19 and Nup214 NTD•Ddx19 NTD were grown at 21°C in hanging drops containing 1  $\mu$ L of the protein (40 mg/mL), which contained 0.5 mM Mg•ADP and 1  $\mu$ L of a reservoir solution. Crystals of Nup214 NTD•Ddx19 and Nup214 NTD•Ddx19 NTD grew in 0.1 M CHES, pH 9.5, 30% PEG 3000, and in 0.1 M sodium acetate, pH 4.2–4.5, 0.8 M sodium di-hydrogen phosphate, and 1.2 M di-potassium hydrogen phosphate, respectively. For cryoprotection, Nup214 NTD•Ddx19 and Nup214 NTD•Ddx19 NTD crystals were stabilized and cryo-protected in 0.1 M CHES, pH 9.5, 30% (vol/vol) PEG 3000, supplemented with 10% (vol/vol) glycerol, and in 0.1 M sodium acetate, pH 4.2, 0.8 M sodium di-hydrogen phosphate, 1.2 M di-potassium phosphate, supplemented with 20% (vol/vol) glycerol, respectively, and flash frozen in liquid nitrogen-cooled liquid propane. X-ray diffraction data were collected at beamlines 8.2.1 and 8.2.2 at the Advanced Light Source, Lawrence Berkeley National Laboratory. X-ray intensities were processed and integrated using the HKL2000 denzo/scalepack package (5), and the CCP4 program package was used for subsequent calculations (6).

**Structure Determination.** The structure of the Nup214 NTD•Ddx19 was solved by molecular replacement, using the coordinates of the Nup214 NTD (2) as a search model in PHASER (7). This resulting electron density map was of high quality and clearly revealed additional density for the N-terminal domain of Ddx19. A model was built with the program O (8) and refined with CNS (9). No electron density was observed for the N-terminal 8 and C-terminal 22 residues of Nup214, and the N-terminal 69 and C-terminal 181 residues that encompass the entire C-terminal RecA-like domain (domain 2) of Ddx19. These residues are presumed to be disordered, and, therefore, have been omitted from the final model. The final model contains residues 9 to 428 and 70 to 298 of Nup214 and Ddx19,

respectively, and has been refined to 3.2 Å resolution with an  $R_{\text{cryst}}$  factor of 24.9% and an  $R_{\text{free}}$  factor of 28.3%.

The structure of the Nup214 NTD•Ddx19 NTD complex was determined using the coordinates of the refined Nup214 NTD•Ddx19 complex as a search model in PHASER (7). The final rounds of refinement were carried out with REFMAC, using the TLS option (10). The final model contains residues 8 to 428 and 69 to 300 of Nup214 and Ddx19, respectively, and has been refined to 2.5 Å resolution with an  $R_{\text{cryst}}$  factor of 19.9% and an  $R_{\text{free}}$  factor of 24.2%. The stereochemical quality of the final models was assessed with PROCHECK (11) and Molprobtity (12). Met-291 in Nup214 is the only outlier in the Nup214 NTD•Ddx19 NTD structure. However, this residue is well defined in the electron density map and is located in a canonical  $\beta$ -turn type II' (13). Data collection and refinement statistics are shown in the Table S1.

**Immunofluorescence Confocal Microscopy.** For immunofluorescence, Ddx19, Nup214 NTD, and their mutants and variants were cloned into the pCMV-HA vector (Clontech) containing a C-terminal HA-tag. The details of the Nup214 and Ddx19 constructs are listed in Table S4. Mammalian cell culture and transfection of HeLa cells were performed as described in ref. 14. HeLa cells were washed in PBS and fixed for 20 min in 4% PFA (Wako) at room temperature (RT) and then washed twice with PBS again. Cells were then permeabilized with 0.3% Digitonin (Electron Microscope Sciences) and 1% BSA (Sigma) in PBS for 10 min at RT. Cells were blocked with 3% BSA in PBS for 20 min.

For Ddx19 variants, the cells were incubated with  $\alpha$ -HA (at a dilution of 1:2,000, Abcam) for 1 h at RT. The cells were washed twice with PBS and were incubated with secondary antibody (goat  $\alpha$ -rabbit Alexa Fluor 488, at a dilution of 1:2,000, Invitrogen) for 1 h at RT. The cells were further incubated with  $\alpha$ -mAb414 (at a dilution 1:1,000, Covance) for 1 h at RT, washed twice with PBS, incubated with secondary antibodies (goat  $\alpha$ -mouse Rodamine-Red X, at a dilution of 1:1,000, Invitrogen) for 1 h at RT and mounted onto cover slips with ProLong Gold Antifade reagent (Invitrogen). Samples were examined on a Zeiss LSM5 EXCITER confocal microscope, and all images acquired by using an aplan-Apochromat 63X with an 1.4-n.a. objective.

For Nup214 variants, the cells were costained with a mouse  $\alpha$ -HA antibody (at a dilution of 1:1,000, Covance) and a rabbit  $\alpha$ -Nup358 antibody (at a dilution of 1:500) (15) for 1 h at RT. The cells were washed 3 times with PBS, incubated with secondary antibodies for 1 h at RT (goat  $\alpha$ -rabbit Alexa Fluor 488, goat  $\alpha$ -rabbit Alexa Fluor 647; both at a dilution of 1:200, Molecular Probes), washed 3 times with PBS, and mounted in Fluoromount G (Electron Microscopy Sciences). The samples were examined using a Leica spectral confocal microscope (model TCS SP).

**Illustrations and Figures.** Figures were generated using PyMOL (www.pymol.org). The molecular surfaces were calculated using MSMS (16), and the electrostatic potential was calculated using APBS (17). Sequence alignments were generated using ClustalX (18) and colored with Alscript (19).

- Hoelz A, Nairn AC, Kuriyan J (2003) Crystal structure of a tetradecameric assembly of the association domain of  $\text{Ca}^{2+}$ /calmodulin-dependent kinase II. *Mol Cell* 11:1241–1251.
- Napetschnig J, Blobel G, Hoelz A (2007) Crystal structure of the N-terminal domain of the human protooncogene Nup214/CAN. *Proc Natl Acad Sci USA* 104(6):1783–1788.
- Story RM, Li H, Abelson JN (2001) Crystal structure of a DEAD box protein from the hyperthermophile *Methanococcus jannaschii*. *Proc Natl Acad Sci USA* 98(4):1465–1470.
- Eswar N, Webb B, Marti-Renom MA, Madhusudhan MS, Eramian D, Shen MY, Pieper U, Sali A (2006) Comparative protein structure modeling using Modeller. *Curr Protoc Bioinformatics* Chapter 5, Unit 5 6 (2006). *Curr Protoc Bioinformatics* Chapter 5, Unit 5 6.
- Otwinowski Z, Minor W (1997) Processing of X-Ray diffraction data collected in oscillation mode. *Methods Enzymol* 276:307–326.
- (1994) The CCP4 suite: Programs for protein crystallography. *Acta Crystallogr D Biol Crystallogr* 50:760–763.
- McCoy AJ (2007) Solving structures of protein complexes by molecular replacement with Phaser. *Acta Crystallogr D Biol Crystallogr* 63(Pt 1):32–41.
- Jones TA, Zou JY, Cowan SW, Kjeldgaard M (1991) Improved methods for building protein models in electron density maps and the location of errors in these models. *Acta Crystallogr A* 47(Pt 2):110–119.
- Brunger AT, et al. (1998) Crystallography and NMR system: A new software suite for macromolecular structure determination. *Acta Crystallogr D* 54(Pt 5):905–921.
- Murshudov GN, Vagin AA, Dodson EJ (1997) Refinement of macromolecular structures by the maximum-likelihood method. *Acta Crystallogr D* 53(Pt 3):240–255.
- Laskowski RA, MacArthur MW, Moss DS, Thornton JM (1993) PROCHECK: A program to check the stereochemical quality of protein structures. *J Appl Crystallogr* 26:283–291.
- Davis IW, Leaver-Fay A, Chen VB, Block JN, Kapral GJ, Wang X, Murray LW, Arendall WB, 3rd, Snoeyink J, Richardson JS, Richardson DC (2007) MolProbity: All-atom contacts and structure validation for proteins and nucleic acids. *Nucleic Acids Res* 35:W375–83.
- Richardson JS (1981) The anatomy and taxonomy of protein structure. *Adv Protein Chem* 34:167–339.
- Wong RW, Blobel G, Coutavas E (2006) Rae1 interaction with NuMA is required for bipolar spindle formation. *Proc Natl Acad Sci USA* 103:19783–7.
- Wu J, Matunis MJ, Kraemer D, Blobel G, Coutavas E (1995) Nup358, a cytoplasmically exposed nucleoporin with peptide repeats, Ran-GTP binding sites, zinc fingers, a cyclophilin A homologous domain, and a leucine-rich region. *J Biol Chem* 270:14209–13.
- Sanner MF, Spehner JC, Olson AJ (1996) Reduced surface: An efficient way to compute molecular surfaces. *Biopolymers* 38(3):305–320.
- Baker NA, Sept D, Joseph S, Holst MJ, McCammon JA (2001) Electrostatics of nanosystems: Application to microtubules and the ribosome. *Proc Natl Acad Sci USA* 98:10037–41.
- Jeanmougin F, Thompson JD, Gouy M, Higgins DG, Gibson TJ (1998) Multiple sequence alignment with Clustal X. *Trends Biochem Sci* 23:403–405.
- Barton GJ (1993) ALSCRIPT: A tool to format multiple sequence alignments. *Protein Eng* 6:37–40.

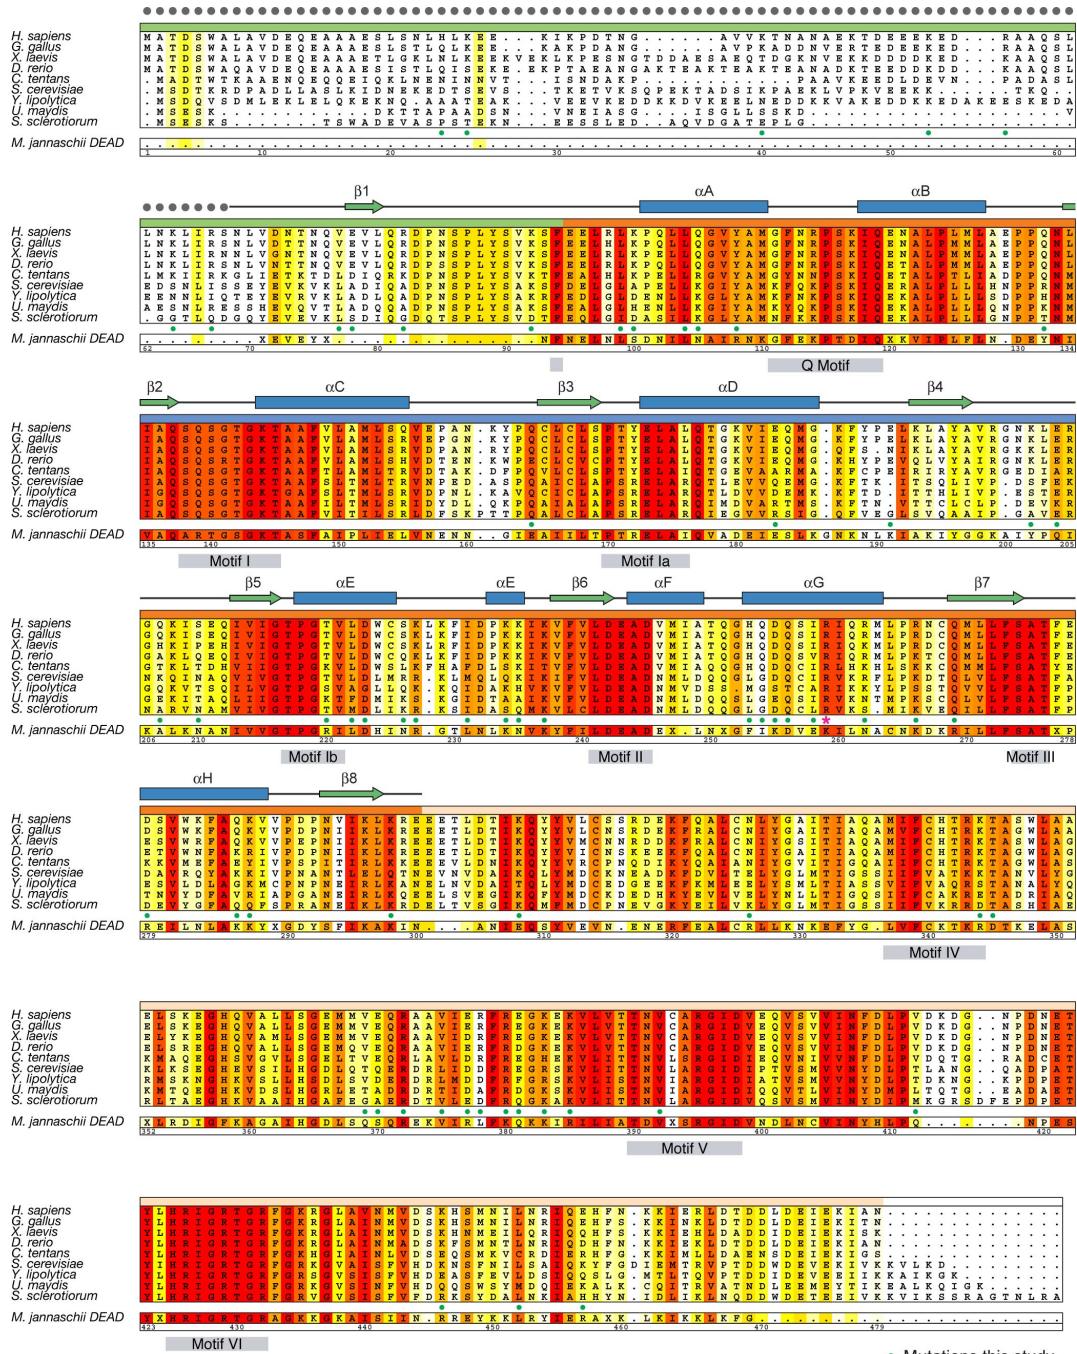

**Fig. S1.** Multispecies sequence alignment of Ddx19 homologs. The overall sequence conservation at each position is shaded in a color gradient from yellow (60% similarity) to dark red (100% identity), using the Blosum62 weighting algorithm. The secondary structure of Ddx19 as observed in the Nup214 NTD•Ddx19 structure is shown above the alignment. The residue numbering is relative to *H. sapiens* Ddx19 and gray boxes below the alignment indicate the position of the 9 conserved DEAD-box helicase motifs. As a reference, the primary sequence of the *M. jansschii* DEAD-box protein MjDEAD is aligned with the Ddx19 homologs.

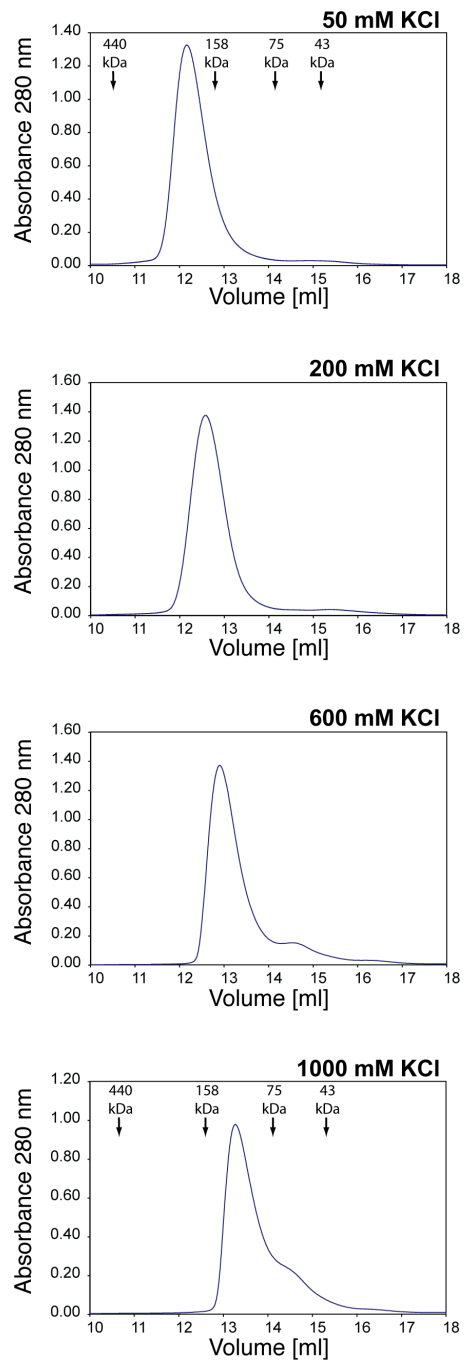

**Fig. S2.** Salt dependence of the Nup214–Ddx19 interaction. Gel filtration profiles of the Nup214•Ddx19 complex at identical protein complex concentrations of 50  $\mu$ M and the indicated salt concentrations. The elution positions for molecular weight standards are indicated.





## Homology Model

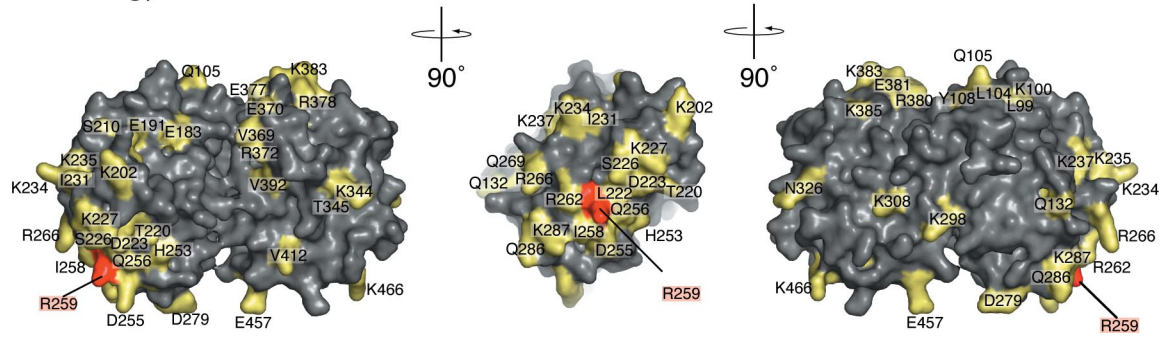

**Fig. S5.** Alanine-scanning mutagenesis of Ddx19. Homology model of Ddx19 illustrating the approximate location of mutated Ddx19 surface residues. Alanine mutants that were capable of interacting with Nup214 are shown in yellow, and mutant R259A, which is incapable of interacting with Nup214, is shown in red. The residue numbering is relative to human Ddx19.





Table S1. Crystallographic analysis

|                                       | Crystal 1 native      | Crystal 2 native      |
|---------------------------------------|-----------------------|-----------------------|
| Contents                              |                       |                       |
| Nup214                                | Nup214 NTD            | Nup214 NTD            |
| Ddx19                                 | Ddx19, residues 1–300 | Ddx19, residues 1–479 |
| Data collection                       |                       |                       |
| Synchrotron                           | ALS                   | ALS                   |
| Beamline                              | BL8.2.2               | BL8.2.1               |
| Space group                           | $P2_12_12_1$          | $P2_1$                |
| Cell dimensions, Å                    |                       |                       |
| <i>a</i>                              | 59.5                  | 61.4                  |
| <i>b</i>                              | 115.4                 | 112.9                 |
| <i>c</i>                              | 143.5                 | 142.6                 |
| Cell dimensions, °                    |                       |                       |
| $\alpha$                              | 90                    | 90                    |
| $\beta$                               | 90                    | 89.9                  |
| $\gamma$                              | 90                    | 90                    |
| Wavelength, Å                         | 1.0000                | 0.9795                |
| Resolution, Å                         | 50.0–2.5              | 50.0–3.2              |
| $R_{\text{sym}}^*$ , %                | 10.5 (68.7)           | 11.3 (39.5)           |
| $\langle I/\sigma \rangle^*$          | 25.0 (2.7)            | 14.3 (3.6)            |
| Completeness, %                       | 98.6 (89.9)           | 91.3 (70.9)           |
| Redundancy*                           | 13.8 (10.8)           | 6.8 (5.9)             |
| Refinement                            |                       |                       |
| Resolution, Å                         | 50.0–2.5              | 50.0–3.2              |
| No. reflections                       |                       |                       |
| Total                                 | 29,350                | 28,125                |
| Test set, %                           | 1,528 (4.9)           | 1,504 (5.1)           |
| $R_{\text{work}}/R_{\text{free}}$ , % | 19.9/24.2             | 24.9/28.3             |
| No. atoms                             | 5,183                 | 10,218                |
| Protein                               | 5,118                 | 10,164                |
| Ligand/ion                            | 33                    | 54                    |
| Water                                 | 32                    | 0                     |
| <i>B</i> factors                      |                       |                       |
| Protein                               | 59                    | 86                    |
| Ligand/ion                            | 58                    | 86                    |
| Water                                 | 60                    | 89                    |
| <i>rmsd</i>                           |                       |                       |
| Bond lengths, Å                       | 49                    | N.A.                  |
| Bond angles, °                        |                       |                       |
| Protein                               | 0.014                 | 0.013                 |
| Ligand/ion                            | 1.5                   | 1.5                   |
| Ramachandran statistics               |                       |                       |
| Most favored, %                       | 89.7                  | 82.1                  |
| Additionally allowed, %               | 9.4                   | 16.5                  |
| Generously allowed, %                 | 0.7                   | 1.3                   |
| Disallowed, %                         | 0.2                   | 0.0                   |

\*Highest-resolution shells are shown in parentheses.

**Table S2. Nup214 NTD mutants**

| Deletions                 | Alanine mutants        |
|---------------------------|------------------------|
| Nup214 NTD                | Nup214 NTD L343A       |
| Nup214 NTD 1–405          | Nup214 NTD D345A       |
| Nup214 NTD $\Delta$ 6D7A  | Nup214 NTD S346A       |
| Nup214 NTD $\Delta$ 1     | Nup214 NTD R348A       |
| Nup214 NTD $\Delta$ 2     | Nup214 NTD E350A       |
| Nup214 NTD $\Delta$ 3     | Nup214 NTD V353A       |
| GST-6D7A-His <sub>6</sub> | Nup214 NTD T354A       |
|                           | Nup214 NTD D355A       |
|                           | Nup214 NTD K356A       |
|                           | Nup214 NTD S357A       |
|                           | Nup214 NTD D358A       |
|                           | Nup214 NTD D359A       |
|                           | Nup214 NTD V353E       |
|                           | Nup214 NTD E350A/V353E |

**Table S3. Ddx19 mutants**

| NTE mutants | Domain 1 mutants | Domain 2 mutants |
|-------------|------------------|------------------|
| H24A        | L99A             | R262A            |
| K26A        | K100A            | R266A            |
| K40A        | L104A*           | Q269A            |
| K53A        | Q105A            | D279A*           |
| R56A        | Y108A            | Q286A            |
| K64A        | Q132A            | K287A            |
| R67A        | Q164A            | K298A            |
| V77A        | E183A            | K308A            |
| E78A        | E191A            | N326A            |
| R82A        | K202A            | K344A            |
| K92A        | E204A            | T345A            |
|             | Q207A            | V369A            |
|             | S210A            | E370A            |
|             | T220A            | R372A            |
|             | L222A            | V375A*           |
|             | D223A            | E377A*           |
|             | S226A            | R378A            |
|             | K227A            | R380A            |
|             | I231A            | E381A            |
|             | K234A            | K383A            |
|             | K235A            | K385A            |
|             | K237A*           | V392A            |
|             | H253A            | V412A            |
|             | Q254A            | K446A            |
|             | D255A            | L452A*           |
|             | Q256A            | E457A            |
|             | I258A            |                  |
|             | R259A            |                  |
|             | R259E            |                  |
|             | R259Q            |                  |
|             | R259K            |                  |

\*Proteins degraded during purification.
